# 1 Estimating the increased transmissibility of 2 the B.1.1.7 strain over previously circulating 3 strains in England using fractions of 4 GISAID sequences and the distribution of 5 serial intervals

6  
7 Chayada Piantham<sup>1</sup>, Kimihito Ito<sup>2\*</sup>,

8 <sup>1</sup>*Graduate School of Infectious Diseases, Hokkaido University; [chayada@czc.hokudai.ac.jp](mailto:chayada@czc.hokudai.ac.jp)*

9 <sup>2</sup>*Research Center for Zoonosis Control, Hokkaido University; [itok@czc.hokudai.ac.jp](mailto:itok@czc.hokudai.ac.jp)*

## 10 Abstract

11 The B.1.1.7 strain, a variant strain of the severe acute respiratory syndrome coronavirus 2 (SARS-CoV-  
12 2), is thought to have higher transmissibility than previously circulating strains in England. The fraction  
13 of the B.1.1.7 strain among SARS-CoV-2 viruses in England have grown rapidly. In this paper, we  
14 propose a method to estimate the selective advantage of a mutant strain over previously circulating strains  
15 using the time course of the fraction of B.1.1.7 strains. Our approach is based on the Maynard Smith's  
16 model of allele frequencies in adaptive evolution, which assumes that the selective advantage of a mutant  
17 strain over previously circulating strains is constant over time. Applying this method to the sequence data  
18 in England using serial intervals of COVID-19, we found that the transmissibility of the B.1.1.7 strain is  
19 40% (with a 95% confidence interval (CI) from 40% to 41%) higher than previously circulating strains in  
20 England. The date of the emergence of B.1.1.7 strains in England was estimated to be September 20, 2020  
21 with its 95% CI from September 11 to September 20, 2020. The result indicated that the control measure  
22 against the B.1.1.7 strain needs to be strengthened by 40% from that against previously circulating strains.  
23 To get the same control effect, contact rates between individuals need to be restricted to 0.71 of the  
24 contact rates that have been achieved from the control measure taken for previously circulating strains.

25  
26

27 **Keywords:** COVID-19, B.1.1.7, selective advantage, adaptive evolution, serial interval, GISAID,  
28 England, SARS-CoV-2

## 29 Introduction

30 Severe acute respiratory syndrome coronavirus 2 (SARS-CoV-2), the causative agent of COVID-19, has  
31 been rapidly evolving since its emergence in 2019. In December 2020, the Public Health England  
32 detected a new cluster of SARS-CoV-2 viruses phylogenetically distinct from the other strains circulating  
33 in the United Kingdom (Chand et al., 2020). These viruses belong to the lineage B.1.1.7 according to the  
34 PANGO nomenclature (Rambaut, Loman, et al., 2020) and the World Health Organization (WHO)  
35 designated them as Variant of Concern, year 2020, month 12, variant 01 (VOC 202012/01) (World Health  
36 Organization, 2020).

37  
38 The B.1.1.7 strain was first detected in England in September 2020, and the numbers of infections with  
39 this strain increased in October and November in 2020 (Chand et al., 2020). By February 2021, B.1.1.7  
40 strain occupied 95% of the SARS-CoV-2 circulating in England (Davies et al., 2021).

41  
42 Several studies have compared the transmissibility of the B.1.1.7 strain to that of previously circulating  
43 strains. Davies et al. estimated that the reproduction number of the B.1.1.7 strain is 43–90% (with a 95%  
44 credible interval of 38–130%) higher than preexisting strains using data from England (Davies et al.,  
45 2021). However, different models resulted in different ranges of estimates in their multiplicative increase  
46 in reproduction number ( $R$ ). Grabowski et al. estimated a 83–118% increase with a confidence interval of  
47 71–140% compared to previously circulating strains in England (Grabowski et al., 2021). Volz et al.  
48 estimated 40–75% increase in  $R$  using data from England (Volz et al., 2021). Their methods use linear  
49 regression of log odds ratio between B.1.1.7 strain and previously circulating strains and estimate increase  
50 of transmissibility under assumption that  $R$  is constant over time during the target period of analysis.  
51 Washington et al. estimated a 35–45% increase using data from the United States of America using  
52 Volz's method (Washington et al., 2021). Chen et al. estimated 49–65% increase in reproduction number  
53 using data from Switzerland also under the constant  $R$  assumption (Chen et al., 2021). Due to the high  
54 transmissibility the B.1.1.7 strain, strong control measure such as lockdown was taken when the strain  
55 was introduced (Davies et al., 2021). Thus, the constant  $R$  assumption is questionable when analyzing the  
56 increase in the reproduction number of B.1.1.7 compared to that of previously circulating strains.

57  
58 In this paper, we propose a method to estimate the selective advantage of a mutant strain over previously  
59 circulating strains. Our approach is based on the Maynard Smith's model of allele frequencies in adaptive  
60 evolution, which assumes that the selective advantage of a mutant strain over previously circulating  
61 strains is constant over time (Maynard Smith & Haigh, 1974). Applying the developed method to the  
62 sequence data in England using the serial interval distribution of COVID-19 estimated by Nishiura et al.  
63 (Nishiura et al., 2020), we estimate the increase in the instantaneous reproduction number of B.1.1.7  
64 strains compare to that of previously circulating strains. Based on the estimate, we discuss its implication  
65 to control measures for COVID-19.

## 66 Materials and Methods

### 67 Sequence data

68 Nucleotide sequences of SARS-CoV-2 viruses was downloaded from GISAID EpiCoV database (Shu &  
69 McCauley, 2017) on March 1, 2021. Nucleotide sequences that determined from viruses detected in  
70 England were selected and aligned to the reference amino acid sequence of S protein of SARS-CoV-2  
71 virus (YP\_009724390) using DIAMOND (Buchfink et al., 2015). The aligned nucleotide sequences were  
72 translated into amino acid sequences, then were aligned with the reference amino acid sequence of S  
73 protein using MAFFT (Katoh et al., 2002). Amino acid sequences having either an ambiguous amino acid  
74 or more than ten gaps were excluded from the rest of analyses. Table 1 shows amino acids on S protein of  
75 characterizing B.1.1.7 strain, retrieved from the PANGO database (Rambaut, Loman, et al., 2020).

76

77 **Table 1. Amino acids on S protein which are used to define B.1.1.7 strains**

| Position on S protein | Amino acid        |
|-----------------------|-------------------|
| 69                    | Deletion          |
| 70                    | Deletion          |
| 144                   | Deletion          |
| 501                   | Tyrosine (Y)      |
| 570                   | Aspartic acid (D) |
| 681                   | Histidine (H)     |
| 716                   | Isoleucine (I)    |
| 982                   | Alanine (A)       |
| 1118                  | Histidine (H)     |

78

79

80 We divided amino acid sequences into three groups based on amino acids shown in Table 1. The first  
81 group is sequences having all of B.1.1.7-defining amino acid substitutions in Table 1. We call a virus in  
82 this group a “B.1.1.7 strain”. The second group are sequences which have none of the B.1.1.7-defining  
83 substitutions. We call a virus in the this group a “non-B.1.1.7 strain”. The third group are sequences  
84 which have at least one but incomplete set of the B.1.1.7-defining amino acid substitutions. We called a  
85 strain in the third group a “B.1.1.7-like strain”. Table 2 shows the number of sequences categorized into  
86 each group. We used the number of B.1.1.7 strains and non-B.1.1.7 strains for the rest of the analyses.  
87 B.1.1.7-like strains were excluded from the analyses, since we do not know whether they had the same  
88 transmissibility as B.1.1.7 strains or not. Figure 1 shows the daily numbers of GISAID sequences of  
89 B.1.1.7 strains, non-B.1.1.7 strains and B.1.1.7-like strains detected in England from September 1, 2020  
90 to February 19, 2021. These numbers are provided in Supplementary Table 1.

91

92 **Table 2. Number of GISAID sequences in England from September 1, 2020 to February 19, 2021**

| B.1.1.7 strains | Non-B.1.1.7 | B.1.1.7-like | Total  |
|-----------------|-------------|--------------|--------|
| 71692           | 65840       | 2227         | 139759 |

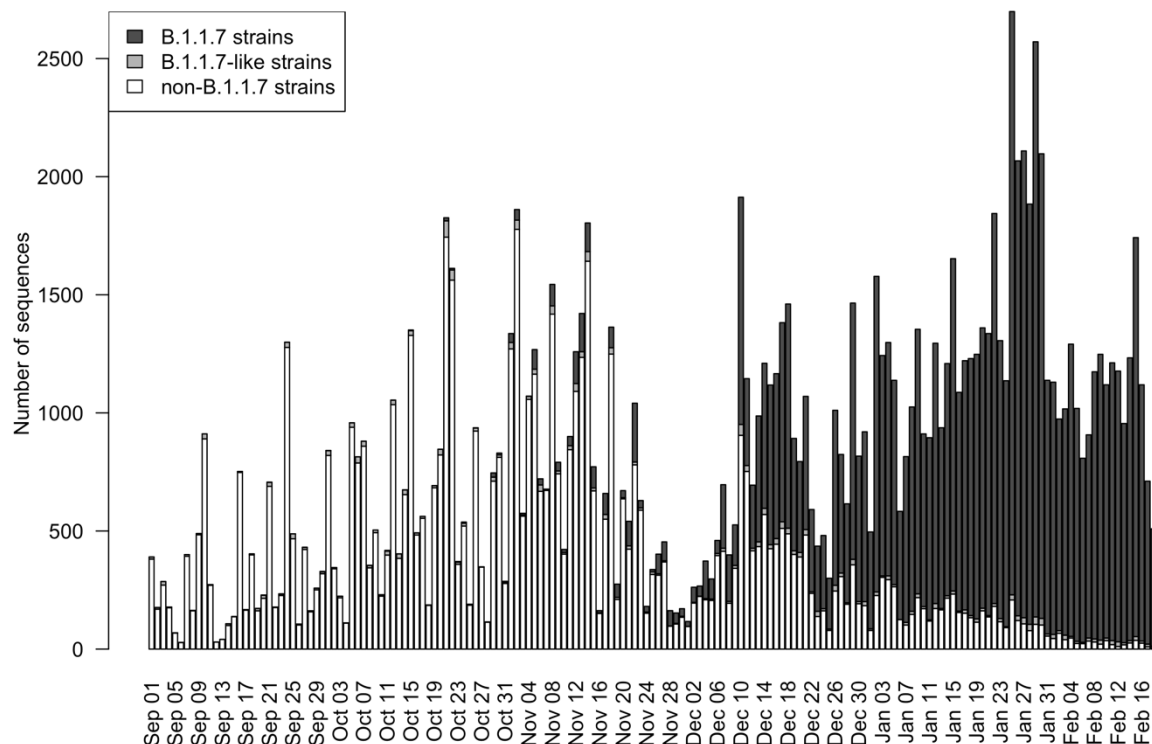

93  
94

95 **Figure 1. Number of sequences in England from September 1, 2020 to February 19, 2021. The**  
96 **nucleotide sequences were retrieved from GISAID on March 1, 2020.**

97 **Serial interval distribution**

98 The method we propose in this paper uses discrete distributions of serial intervals. Function  $g(i)$  gives  
99 the probability that the onset day of a secondary infection is at  $i$  days after the onset day of its primary  
100 case. We obtained the values of  $g(i)$  by discretizing the lognormal distribution of serial intervals of  
101 COVID-19 estimated by Nishiura et al. (Nishiura et al., 2020). Thus, the probability mass function of  
102 serial intervals is given by

103 
$$g(i) = \int_i^{i+1} f(t) dt,$$

104 where  $f(t)$  is the probability density function of a lognormal distribution with a mean of 4.7 days and a  
105 standard deviation of 2.9 days.

106 **Model of Advantageous Selection**

107 Consider we have a large population of viruses consisting of strains of two genotypes  $A$  and  $a$ , of which  
108 fraction in the viral population at a calendar date  $t$  are  $q_A(t)$  and  $q_a(t)$ , respectively. Suppose also that  
109 genotype  $A$  is mutant of  $a$  that emerges at time  $t_0$ .

110

111 We assume that a virus of genotype  $A$  generates  $1 + s$  times as many secondary transmissions as those of  
 112 genotype  $a$ . Then,  $s$  can be considered as the coefficient of selective advantage in adaptive evolution. As  
 113 described by Maynard Smith and Haigh (1974), the fraction of viruses of allele  $A$  after the  $n$   
 114 transmissions,  $q_n$ , satisfies

$$q_{n+1} = \frac{(1+s)q_n}{(1+s)q_n + (1-q_n)} = \frac{1+s}{1+sq_n} q_n. \quad (1)$$

115

116 Let  $g(i)$  be a discrete distribution of serial intervals defined in the previous subsection. Since the  
 117 expected fraction of allele  $A$  in the population at calendar time  $t$  can be represented as  $s$  and  $q_A(t-i)$  for  
 118  $0 \leq i \leq t$  with a probability of  $g(i)$ , the value of  $q_A(t)$  can be represented as follows.

119

$$q_A(t) = \sum_{i=0}^t g(i) \frac{1+s}{1+sq_A(t-i)} q_A(t-i). \quad (2)$$

120

121 Assuming  $g(0) = 0$ , we can approximate the formula.

$$q_A(t) \approx \sum_{i=1}^t g(i) \frac{1+s}{1+sq_A(t-i)} q_A(t-i). \quad (3)$$

122

## 123 Likelihood Function

124 Let  $n(t)$  be the number of sequences of either genotype  $A$  or  $a$  observed at calendar date  $t$ . Let  $d_1, \dots, d_k$   
 125 be calendar dates such that  $n(d_j) > 0$  for  $1 \leq j \leq k$ . Suppose that we have  $n_A(d_j)$  samples of genotype  $A$   
 126 at calendar date  $d_j$ . Since genotype  $A$  emerged at time  $t_0$ ,  $q_A(d_j) = 0$  and  $q_a(d_j) = 1$  for  $d_j < t_0$ . Let  
 127  $q_0$  be initial frequency of genotype  $A$ , i.e.,  $q_0 = q_A(t_0)$ . Then the following equation gives the likelihood  
 128 function of  $s$ ,  $t_0$ , and  $q_0$  for observing  $n_A(d_j)$  samples of viruses of genotype  $A$  at calendar date  $d_j$ .

129

$$L(s, t_0, q_0; n_A(d_j)) = \binom{n(d_j)}{n_A(d_j)} q_A(d_j)^{n_A(d_j)} (1 - q_A(d_j))^{n(d_j) - n_A(d_j)}, \quad (4)$$

130

131 for  $1 \leq j \leq k$ . The likelihood function of  $s$ ,  $t_0$ , and  $q_0$  for observing  $n_A(d_1), \dots, n_A(d_k)$  sequences of  
 132 genotype  $A$  at calendar dates  $d_1, \dots, d_k$  is given by the following formula.

$$L(s, t_0, q_A(t_0); n_A(d_1), \dots, n_A(d_k)) = \prod_{j=1}^k L(s, t_0, q_A(t_0); n_A(d_j)) \quad (5)$$

133

## 134 Parameter estimation from sequence data

135 The B.1.1.7 strain was first detected in England on September 20, 2020. We assume that  $t_0$  is this day or  
 136 someday before this day. Parameters  $s$ ,  $t_0$ , and  $q_0$  were estimated by maximizing likelihood of

137 observations on September 1, 2020 and later on. B.1.1.7 strains, viruses having complete subset of  
138 B.1.1.7-defining substitutions on its S protein were considered as genotype A. The non-B.1.1.7 strains,  
139 viruses having none of B.1.1.7-defining substitutions were considered to be genotype *a*. The B.1.1.7-like  
140 strains, viruses having an incomplete set of B.1.1.7 substitutions on the S protein, were excluded from the  
141 analysis. Parameters of  $s$ ,  $t_0$ , and  $q_0$  were estimated by maximizing log likelihood defined in Equation (5).  
142 The 95% confidence intervals of parameters were estimated by profile likelihood (Pawitan, 2013). The  
143 optimization of likelihood function was done by the nloptr package in R (Johnson; Rowan, 1990).

## 144 Results

145 The selective advantage of B.1.1.7 strains over non-B.1.1.7 strains,  $s$ , was estimated to be 0.40 with its  
146 95% confidence intervals from 0.40 to 0.41 (Table 2). The date of emergence of B.1.1.7 strains in  
147 England,  $t_0$ , was estimated to be September 20, 2020 with its 95% confidence interval from September  
148 11, 2020 to September 20, 2020. The initial fraction of B.1.1.7 among non-B.1.1.7 and B.1.1.7 strains at  
149 the emergence in England,  $q_0$ , was estimated to be 0.0030 with its 95% confidence intervals from 0.0014  
150 to 0.0031.

151

152 **Table 2. Maximum likelihood estimations of parameters**

| Parameter | Estimate           | 95% CI                                   |
|-----------|--------------------|------------------------------------------|
| $s$       | 0.40               | [0.40, 0.41]                             |
| $t_0$     | September 20, 2020 | [September 11, 2020, September 20, 2020] |
| $q_0$     | 0.0030             | [0.0014, 0.0031]                         |

153

154 Figure 2 shows the time course of the fraction of B.1.1.7 strains among all strains except B.1.1.7-like  
155 strains detected in the England from September 1, 2020 to February 19, 2021. White circles indicate daily  
156 fractions of B.1.1.7 strains among all strains except B.1.1.7-like strains. Solid line indicates the time  
157 course of fraction of B.1.1.7 strains calculated using parameters estimated from the data. Dashed lines  
158 indicate its lower and upper bound of its 95% CI.

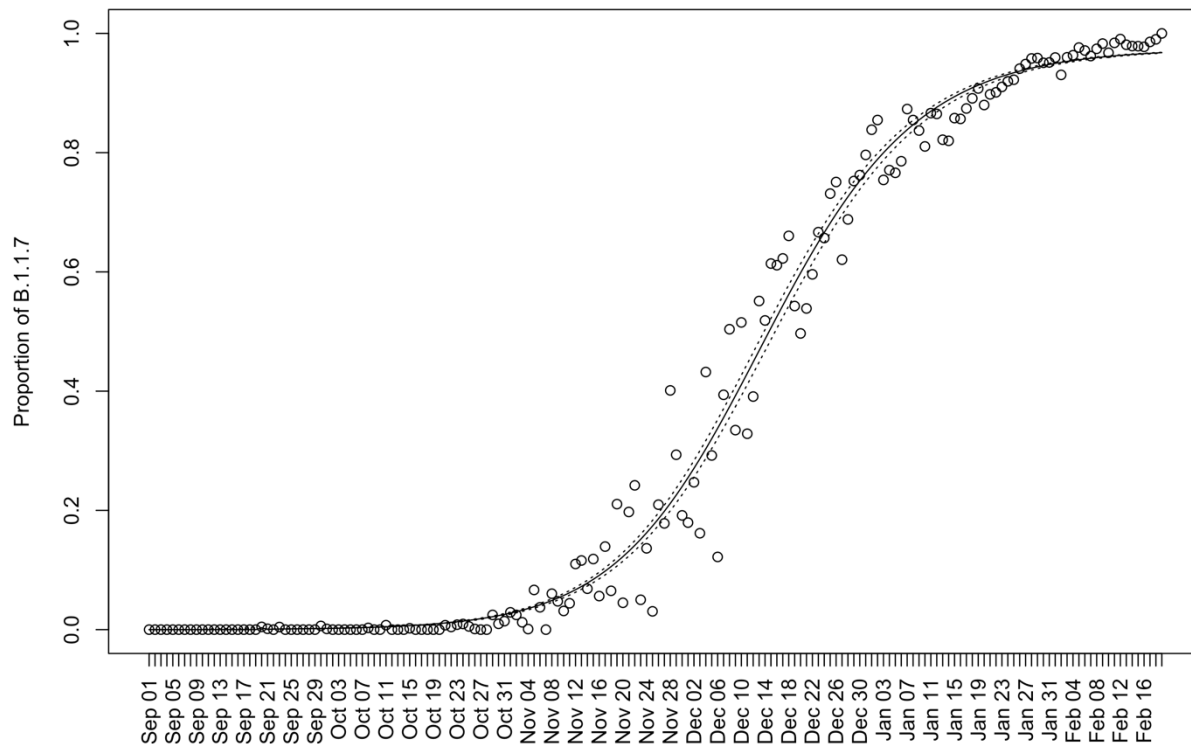

159  
160 **Figure 2. Time course of the fraction of B.1.1.7 strains among all strains except B.1.1.7-like strains**  
161 **detected in England from September 1, 2020 to February 19, 2021. White circles indicate the**  
162 **fraction of B.1.1.7 strains among B.1.1.7 and non-B.1.1.7 strains. The nucleotide sequences were**  
163 **retrieved from GISAID on March 1, 2021. Solid line indicates the time course of fraction of B.1.1.7**  
164 **strains calculated using parameters estimated from the data. Dashed lines indicate its lower and**  
165 **upper bound of its 95% CI.**

## 166 Discussion

167 In this paper, the selective advantage of the B.1.1.7 strain in England over non-B.1.1.7 strains was  
168 estimated to be 0.40 with a 95% CI from 0.40 to 0.41. The date of emergence of B.1.1.7 strains in  
169 England was estimated to be September 20, 2020 with its 95% confidence interval from September 11,  
170 2020 to September 20, 2020. The initial fraction of B.1.1.7 among all sequences except B.1.1.7-like  
171 strains at the time of emergence in England was estimated to be 0.0030 with its 95% confidence intervals  
172 from 0.0014 to 0.0031.

173  
174 The estimated selective advantage of 0.40 indicates that the B.1.1.7 strain is 40% more transmissible than  
175 that of previously circulating strains in England. This means that the control measures for the B.1.1.7  
176 strain needs to be strengthened by 40% compared to that for the previously circulating strains. To get the  
177 same control effect, contact rates between individuals needs to be restricted below  $1/1.40 = 0.71$  of the  
178 contact rates to achieve the same control measure for the previously circulating strains.

179 Our estimation method is based on the principle that the expected fraction of a mutant strain among all  
180 strains can be determined from those in the previous generation using the serial interval distribution of  
181 infections. The method assumes that the selective advantage of a mutant strain over previously circulating  
182 strains is constant over time, which is based on Maynard Smith's model of allele frequencies in adaptive  
183 evolution. The method is related to Fraser's method for estimating the instantaneous reproduction number  
184 (Fraser, 2007). However, it is our future work to mathematically clarify the relationship between the  
185 selective advantage estimated using our method and the instantaneous reproduction numbers of two  
186 strains.

187  
188 The selective advantage estimated in this study relies on the serial interval distribution, and thus the  
189 results may change depending on serial interval distribution used in the analysis. In this paper, we used  
190 the serial interval distribution estimated by Nishiura et al. (Nishiura et al., 2020). The distribution is a  
191 lognormal distribution with a mean serial interval of 4.7 days with a standard deviation of 2.9 days.  
192 Several groups have estimated the serial intervals of SARS-CoV-2 using different datasets. Some  
193 variations are observed among these estimated values (Rai et al., 2021). Volz et al. (Volz et al., 2021)  
194 assumes a fixed serial interval of 6.5 days based on results by Bi et al. (Bi et al., 2020). However, Ali et  
195 al. have reported that the serial interval estimated using data from China during before January 22, 2020  
196 was longer than estimates after January 22, 2020 (Ali et al., 2020). The serial interval estimated by Bi et  
197 al. contains data before January 22, 2020 and there might be some possibility that the estimated serial  
198 interval does not reflect the current situation. This is the reason why we did not use serial interval  
199 estimated by Bi et al.

200  
201 As of March 17, 2021, the B.1.1.7 strain has now been observed in 93 countries (Rambaut, Holmes, et al.,  
202 2020). The selective advantage of the B.1.1.7 strains over previously circulating strains in other countries  
203 remains to be our future work. Variant strains originated in Brazil and South Africa also show higher  
204 transmissibility than previously circulating strains (World Health Organization, 2021). There is an urgent  
205 need to estimate the selective advantage of these strains over previously circulating strains. We hope that  
206 the developed methodology provides important information for countries in the world to establish control  
207 measures against variants strains such as the B.1.1.7 strain.

## 208 Acknowledgement

209 We gratefully acknowledge the laboratories responsible for obtaining the specimens and the laboratories  
210 where genetic sequence data were generated and shared via the GISAID Initiative, on which this research  
211 is based. This work was supported by CREST (grant number JPMJCR1413) from Japan Science and  
212 Technology Agency (<http://www.jst.go.jp/>), and the World-leading Innovative and Smart Education  
213 (WISE) Program (1801) from the Ministry of Education, Culture, Sports, Science, and Technology, Japan  
214 (<http://www.mext.go.jp/>). The funders had no role in the study design, data collection and analysis,  
215 decision to publish, or preparation of the manuscript.

## 216 Conflict of Interest

217 We declare that there is no conflict of interest.



## 218 References

- 219 1. Ali, S. T., Wang, L., Lau, E. H. Y., Xu, X. K., Du, Z., Wu, Y., Leung, G. M., & Cowling,  
220 B. J. (2020). Serial interval of SARS-CoV-2 was shortened over time by  
221 nonpharmaceutical interventions. *Science*, 369(6507), 1106-1109.  
222 doi:10.1126/science.abc9004
- 223 2. Bi, Q., Wu, Y., Mei, S., Ye, C., Zou, X., Zhang, Z., Liu, X., Wei, L., Truelove, S. A.,  
224 Zhang, T., Gao, W., Cheng, C., Tang, X., Wu, X., Wu, Y., Sun, B., Huang, S., Sun, Y.,  
225 Zhang, J., Ma, T., Lessler, J., & Feng, T. (2020). Epidemiology and transmission of  
226 COVID-19 in 391 cases and 1286 of their close contacts in Shenzhen, China: a  
227 retrospective cohort study. *Lancet Infect Dis*, 20(8), 911-919. doi:10.1016/S1473-  
228 3099(20)30287-5
- 229 3. Buchfink, B., Xie, C., & Huson, D. H. (2015). Fast and sensitive protein alignment using  
230 DIAMOND. *Nat Methods*, 12(1), 59-60. doi:10.1038/nmeth.3176
- 231 4. Chand, M., Hopkins, S., Dabrera, G., Achison, C., Barclay, W., Ferguson, N., Volz, E.,  
232 Loman, N., Rambaut, A., & Barrett, J. (2020). *Investigation of novel SARS-COV-2*  
233 *variant. Variant of Concern 202012/01* (PHE gateway number: GW-1824). Retrieved  
234 from  
235 [https://assets.publishing.service.gov.uk/government/uploads/system/uploads/attachment\\_](https://assets.publishing.service.gov.uk/government/uploads/system/uploads/attachment_data/file/959438/Technical_Briefing_VOC_SH_NJL2_SH2.pdf)  
236 [data/file/959438/Technical\\_Briefing\\_VOC\\_SH\\_NJL2\\_SH2.pdf](https://assets.publishing.service.gov.uk/government/uploads/system/uploads/attachment_data/file/959438/Technical_Briefing_VOC_SH_NJL2_SH2.pdf)
- 237 5. Chen, C., Nadeau, S., Topolsky, I., Manceau, M., Huisman, J. S., Jablonski, K. P.,  
238 Fuhrmann, L., Dreifuss, D., Jahn, K., Beckmann, C., Redondo, M., Kobel, O., Noppen,  
239 C., Risch, L., Risch, M., Wohlwend, N., Kas, S., Bodmer, T., Roloff, T., Stange, M.,  
240 Egli, A., Eckerle, I., Denes, R., Feldkamp, M., Nissen, I., Santacrose, N., Burcklen, E.,  
241 Aquino, C., de Gouvea, A. C., Moccia, M. D., Grüter, S., Sykes, T., Opitz, L., White, G.,  
242 Neff, L., Popovic, D., Patrignani, A., Tracy, J., Schlapbach, R., Dermitzakis, E. T.,  
243 Harshman, K., Xenarios, I., Pegeot, H., Cerutti, L., Penet, D., Blin, A., Elies, M., Althaus,  
244 C., Beisel, C., Beerenwinkel, N., Ackermann, M., & Stadler, T. (2021). Quantification of  
245 the spread of SARS-CoV-2 variant B.1.1.7 in Switzerland. *medRxiv*,  
246 2021.2003.2005.21252520. doi:10.1101/2021.03.05.21252520
- 247 6. Davies, N. G., Abbott, S., Barnard, R. C., Jarvis, C. I., Kucharski, A. J., Munday, J. D.,  
248 Pearson, C. A. B., Russell, T. W., Tully, D. C., Washburne, A. D., Wenseleers, T.,  
249 Gimma, A., Waites, W., Wong, K. L. M., van Zandvoort, K., Silverman, J. D., Group, C.  
250 C.-W., Consortium, C.-G. U., Diaz-Ordaz, K., Keogh, R., Eggo, R. M., Funk, S., Jit, M.,  
251 Atkins, K. E., & Edmunds, W. J. (2021). Estimated transmissibility and impact of SARS-  
252 CoV-2 lineage B.1.1.7 in England. *Science*. doi:10.1126/science.abg3055
- 253 7. Fraser, C. (2007). Estimating individual and household reproduction numbers in an  
254 emerging epidemic. *PLoS One*, 2(8), e758. doi:10.1371/journal.pone.0000758
- 255 8. Grabowski, F., Preibisch, G., Giziński, S., Kochańczyk, M., & Lipniacki, T. (2021).  
256 SARS-CoV-2 Variant of Concern 202012/01 Has about Twofold Replicative Advantage  
257 and Acquires Concerning Mutations. *Viruses*, 13(3), 392. Retrieved from  
258 <https://www.mdpi.com/1999-4915/13/3/392>

- 259 9. Johnson, S. G. The NLOpt nonlinear-optimization package. Retrieved from <http://ab->  
260 [initio.mit.edu/nlopt](http://ab-initio.mit.edu/nlopt)
- 261 10. Katoh, K., Misawa, K., Kuma, K., & Miyata, T. (2002). MAFFT: a novel method for  
262 rapid multiple sequence alignment based on fast Fourier transform. *Nucleic Acids Res*,  
263 *30*(14), 3059-3066. doi:10.1093/nar/gkf436
- 264 11. Maynard Smith, J., & Haigh, J. (1974). The hitch-hiking effect of a favourable gene.  
265 *Genet Res*, *23*(1), 23-35. Retrieved from <https://www.ncbi.nlm.nih.gov/pubmed/4407212>
- 266 12. Nishiura, H., Linton, N. M., & Akhmetzhanov, A. R. (2020). Serial interval of novel  
267 coronavirus (COVID-19) infections. *Int J Infect Dis*, *93*, 284-286.  
268 doi:10.1016/j.ijid.2020.02.060
- 269 13. Pawitan, Y. (2013). *In All Likelihood: Statistical Modelling and Inference Using*  
270 *Likelihood*. Croydon: Oxford University Press.
- 271 14. Rai, B., Shukla, A., & Dwivedi, L. K. (2021). Estimates of serial interval for COVID-19:  
272 A systematic review and meta-analysis. *Clin Epidemiol Glob Health*, *9*, 157-161.  
273 doi:10.1016/j.cegh.2020.08.007
- 274 15. Rambaut, A., Holmes, E. C., O'Toole, A., Hill, V., McCrone, J. T., Ruis, C., du Plessis,  
275 L., & Pybus, O. G. (2020). A dynamic nomenclature proposal for SARS-CoV-2 lineages  
276 to assist genomic epidemiology. *Nat Microbiol*, *5*(11), 1403-1407. doi:10.1038/s41564-  
277 020-0770-5
- 278 16. Rambaut, A., Loman, N., Pybus, O., Barclay, W., Barrett, J., Carabelli, A., Connor, T.,  
279 Peacock, T., Robertson, D. L., & Volz, E. (2020, 5 February 2021). Preliminary genomic  
280 characterisation of an emergent SARS-CoV-2 lineage in the UK defined by a novel set of  
281 spike mutations. Retrieved from [https://virological.org/t/preliminary-genomic-](https://virological.org/t/preliminary-genomic-characterisation-of-an-emergent-sars-cov-2-lineage-in-the-uk-defined-by-a-novel-set-of-spike-mutations/563)  
282 [characterisation-of-an-emergent-sars-cov-2-lineage-in-the-uk-defined-by-a-novel-set-of-](https://virological.org/t/preliminary-genomic-characterisation-of-an-emergent-sars-cov-2-lineage-in-the-uk-defined-by-a-novel-set-of-spike-mutations/563)  
283 [spike-mutations/563](https://virological.org/t/preliminary-genomic-characterisation-of-an-emergent-sars-cov-2-lineage-in-the-uk-defined-by-a-novel-set-of-spike-mutations/563)
- 284 17. Rowan, T. (1990). *Functional Stability Analysis of Numerical Algorithms*. (Ph.D. Thesis).  
285 University of Texas, Austin.
- 286 18. Shu, Y., & McCauley, J. (2017). GISAID: Global initiative on sharing all influenza data -  
287 from vision to reality. *Euro Surveill*, *22*(13). doi:10.2807/1560-  
288 7917.ES.2017.22.13.30494
- 289 19. Volz, E., Mishra, S., Chand, M., Barrett, J. C., Johnson, R., Geidelberg, L., Hinsley, W.  
290 R., Laydon, D. J., Dabrera, G., O'Toole, Á., Amato, R., Ragonnet-Cronin, M., Harrison,  
291 I., Jackson, B., Ariani, C. V., Boyd, O., Loman, N. J., McCrone, J. T., Gonçalves, S.,  
292 Jorgensen, D., Myers, R., Hill, V., Jackson, D. K., Gaythorpe, K., Groves, N., Sillitoe, J.,  
293 Kwiatkowski, D. P., Flaxman, S., Ratmann, O., Bhatt, S., Hopkins, S., Gandy, A.,  
294 Rambaut, A., & Ferguson, N. M. (2021). Transmission of SARS-CoV-2 Lineage B.1.1.7  
295 in England: Insights from linking epidemiological and genetic data. *medRxiv*,  
296 2020.2012.2030.20249034. doi:10.1101/2020.12.30.20249034
- 297 20. Washington, N. L., Gangavarapu, K., Zeller, M., Bolze, A., Cirulli, E. T., Schiabor  
298 Barrett, K. M., Larsen, B. B., Anderson, C., White, S., Cassens, T., Jacobs, S., Levan, G.,  
299 Nguyen, J., Ramirez, J. M., Rivera-Garcia, C., Sandoval, E., Wang, X., Wong, D.,  
300 Spencer, E., Robles-Sikisaka, R., Kurzban, E., Hughes, L. D., Deng, X., Wang, C.,  
301 Servellita, V., Valentine, H., De Hoff, P., Seaver, P., Sathe, S., Gietzen, K., Sickler, B.,

- 302 Antico, J., Hoon, K., Liu, J., Harding, A., Bakhtar, O., Basler, T., Austin, B., Isaksson,  
303 M., Febbo, P., Becker, D., Laurent, M., McDonald, E., Yeo, G. W., Knight, R., Laurent,  
304 L. C., de Feo, E., Worobey, M., Chiu, C., Suchard, M. A., Lu, J. T., Lee, W., &  
305 Andersen, K. G. (2021). Genomic epidemiology identifies emergence and rapid  
306 transmission of SARS-CoV-2 B.1.1.7 in the United States. *medRxiv*.  
307 doi:10.1101/2021.02.06.21251159
- 308 21. World Health Organization. (2020). SARS-CoV-2 Variants. *Disease Outbreak News*.  
309 Retrieved from <https://www.who.int/csr/don/31-december-2020-sars-cov2-variants/en/>
- 310 22. World Health Organization. (2021). *COVID-19 Weekly Epidemiological Update*.  
311 Retrieved from [https://www.who.int/publications/m/item/weekly-epidemiological-](https://www.who.int/publications/m/item/weekly-epidemiological-update---9-february-2021)  
312 [update---9-february-2021](https://www.who.int/publications/m/item/weekly-epidemiological-update---9-february-2021)
- 313
